# Supplementary material for: Heterogeneous resource federation with a centralized security model for information extraction
Source: Springer Nature journal article supplement (doi:10.1186/1869-0238-4-10), 2013-01-01

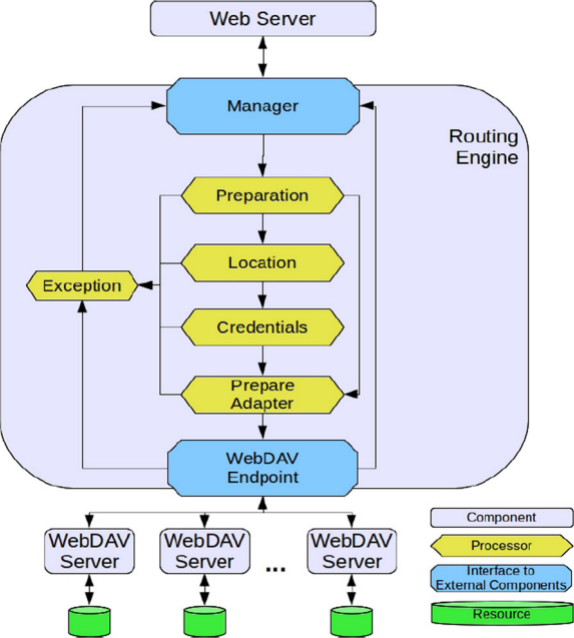

Supplement: 13174_2013_14_MOESM2_ESM.pdf [file 13174_2013_14_MOESM2_ESM.pdf]
